# Supplementary material for: Classification of First-Episode Schizophrenia Patients and Healthy Subjects by Automated MRI Measures of Regional Brain Volume and Cortical Thickness
Source: PLoS One. 2011 Jun 21;6(6):e21047. doi: 10.1371/journal.pone.0021047 (PMC3119676; doi:10.1371/journal.pone.0021047)
Supplement: Table S1 — The results of comparison of the ROI volumes between schizophrenia patients and healthy controls. (XLSX) [file pone.0021047.s001.xlsx]

## Sheet: Table2
Table S1
Comparison of the ROI volumes
Region of intererst	Hemisphere	Healthy controls				Schizophrenia patients				ANCOVA main effects
		Male (n=22)		Female (n=18)		Male (n=29)		Female (n=23)		Diagnosis		Gender		Hemisphere
		Volume	SD	Volume	SD	Volume	SD	Volume	SD	F	p	F	p	F	p
Amygdala	Left	1760.18	211.985	1434.94	143.856	1627.79	185.078	1417.43	122.003	1.48616	0.226146	15.1952	<0.001*	0.00643812	0.936234
	Right	1621.73	206.205	1302.89	142.008	1534.69	166.31	1307.96	96.0835
Hippocampus	Left	4619.77	517.791	4143.06	342.269	4145.17	369.34	3865.57	262.407	23.4041	<0.001*	0.379115	0.539703	1.26103	0.264581
	Right	4362.55	489.274	4094	435.583	3931.31	395.248	3718.35	268.259
Rostral anterior cingulate cortex	Left	2410.77	469.959	2202.94	250.717	2587.48	502.596	2191.78	406.676	0.179444	0.672909	1.96248	0.164846	1.55714	0.215471
	Right	2283.86	682.771	2364.44	337.482	2357.69	562.6	2053.74	485.045
Caudal anterior cingulate cortex	Left	2261.95	385.123	2044.56	334.321	2149.62	523.075	1890.35	465.721	4.50517	0.0366676	0.427235	0.515093	0.068955	0.793492
	Right	2305.41	692.115	2090.5	464.102	2010.66	412.356	1920.26	531.329
Posterior cingulate cortex	Left	4039.86	596.009	3629.72	412.054	3728.48	505.301	3396.7	620.275	3.92021	0.0509066	0.890545	0.347973	0.774817	0.381184
	Right	3978.32	845.133	3242.83	364.724	3614.03	516.926	3260.65	408.59
Isthmus cingulate cortex	Left	2693.45	702.463	2300.56	341.672	2574.83	475.924	2177.83	264.721	1.28582	0.25997	0.467062	0.496179	2.41865	0.123571
	Right	2464.68	399.202	2358.17	386.412	2378.76	333.949	2133.39	490.286
Superior frontal gyrus	Left	25943.8	3008.99	23990.5	1698.28	24746	2939.49	22347.8	2626.39	10.3423	0.00183255	0.330531	0.566847	0.169472	0.681606
	Right	24342	2595.81	23116.7	2072.19	23094.7	2823.67	20847.6	2252.91
Caudal middle frontal gyrus	Left	7281.5	1455.66	6686.56	1131.69	6741.17	1307.17	6386.57	1186.58	1.30009	0.257363	0.707933	0.402464	0.156271	0.693592
	Right	7283.95	2015.85	6386.06	1054.25	6581.34	1271.51	6474.39	1057.35
Rostral middle frontal gyrus	Left	18543	2004.23	16356.7	1764.44	17127	2358.29	15583.7	2052.18	8.37618	0.00481675	0.417013	0.520151	0.134931	0.714275
	Right	19536.6	2685.86	17155.5	2135.3	18256	2612.35	15673.3	2273.58
Pars opercularis	Left	4986.27	991.467	4904.44	833.667	4968.79	980.062	4693.22	811.516	4.1777	0.0440188	0.547245	0.46146	0.835277	0.363306
	Right	4783.27	1018.88	4038.56	585.807	3954.41	588.427	3878.26	552.77
Pars triangularis	Left	4737.14	866.669	4618.33	558.046	4672.38	1041.6	4166.48	1081.53	4.8144	0.0309193	1.41447	0.237588	5.57894	0.0204358
	Right	4881.95	848.406	5289.56	1087.48	5052.66	897.975	4231.3	610.486
Pars orbitalis	Left	2537.82	458.286	2248.72	330.644	2303.76	467.537	2146.61	349.336	2.44187	0.121808	0.812994	0.369755	0.0390463	0.843823
	Right	3178.86	605.024	2751.22	425.225	2903.59	531.081	2710.3	446.727
Lateral orbitofrontal cortex	Left	8364.55	1141.41	7750.94	817.201	8195.48	988.026	7102.91	806.547	6.72336	0.0111818	0.780383	0.379487	1.47935	0.227204
	Right	8805.32	851.731	8123.67	731.952	8237.28	980.295	7596.57	950.203
Medial orbitofrontal cortex	Left	5674.05	841.446	5178.5	819.621	5093.66	925.816	4715.35	571.164	7.34097	0.00813342	0.391888	0.532967	0.0454714	0.831644
	Right	5311.95	663.172	4973.28	700.564	5232.9	696.129	4638.3	615.199
Frontal pole	Left	887.727	243.034	896.444	202.2	866.276	242.959	864.696	179.473	1.12589	0.291624	4.42749	0.0382839	0.000786965	0.977685
	Right	1038.14	220.804	1126.44	254.201	985.828	232.161	1046.57	200.334
Precentral gyrus	Left	14804.6	1808.56	14087.9	1524.69	13886.6	2148.03	12972.3	1371.11	2.91683	0.0912674	6.39139	0.0132943	0.000188684	0.989072
	Right	14633.6	1954.05	13790.2	1133.49	13899.2	2139.2	13483.1	1620.19
Paracentral gyrus	Left	3760.59	530.846	3519.89	617.787	3677.55	637.925	3221.57	543.888	0.824416	0.366429	0.226447	0.635378	2.10543	0.150415
	Right	4330.91	574.623	4122.72	549.465	4312.83	774.229	4073.87	600.968
Postcentral gyrus	Left	10870.5	1655.73	10799.2	1072.71	10506.7	1152.6	9740.96	1435.74	4.94903	0.0287235	1.11162	0.294683	0.0118526	0.913559
	Right	11706.1	1902.23	10579.3	1134.71	10400.4	1644.8	10661.7	1890.81
Superior temporal gyrus	Left	14320.9	1904.08	13477	1102.08	13498.5	1735.71	12218.9	1294.84	10.499	0.0016992	1.87215	0.174793	0.156901	0.693007
	Right	13823.7	1739.31	12895.5	1642.6	12682	2320.27	11628.5	1660.46
Middle temporal gyrus	Left	14101.2	1612.54	12664.8	1188.14	13220.5	1338.56	11996	1117.23	7.52654	0.00739805	1.40199	0.239654	1.16884	0.282662
	Right	14246	1405.62	13244.7	1263.07	13702.2	1585.14	12356.5	1218.28
Inferior temporal gyrus	Left	13339.5	1465.82	10671.1	1509.12	12018.8	1508.76	10760.9	1696.49	2.02895	0.157946	1.258	0.265152	0.557498	0.457307
	Right	13457.4	2506.58	11492.1	1213.06	12078.7	1812	11725.8	1910.01
Fusiform gyrus	Left	10594.3	1338.7	10593.1	1550.24	9729.07	1665.6	9215.52	1379.03	13.8924	<0.001*	2.05677	0.155157	0.0884068	0.766929
	Right	9662.41	1544.25	9240.83	1089.9	8881.62	1439.33	8288.17	1200.7
Entorhinal cortex	Left	2157.55	487.174	1765.78	341.516	1795.17	436.941	1642.13	359.164	2.98142	0.087816	0.00744552	0.931439	0.0230472	0.87969
	Right	1841.14	420.143	1604.22	307.867	1714.1	417.892	1632.3	247.479
Parahippocampal gyrus	Left	2093.77	277.823	1839.89	336.903	1768.45	280.369	1778.78	231.769	13.8998	<0.001	0.137652	0.711539	1.14024	0.28859
	Right	1973.32	260.775	1842.78	249.965	1773.83	315.729	1674.91	220.976
Temporal pole	Left	2825.91	476.12	2598.39	336.16	2657.93	417.304	2627.09	415.206	0.894465	0.34692	0.907744	0.343384	1.89617	0.172082
	Right	2824.18	441.485	2636.72	316.543	2581.79	540.197	2689.13	449.9
Supramarginal gyrus	Left	11417.9	1111.98	10711.6	996.19	11101.2	1946.12	9670.17	1271.23	5.4604	0.0217769	1.67974	0.198427	0.0847778	0.771625
	Right	12567.8	1797.79	11710.7	1424.61	12286.9	1958.01	10703	1259.72
Superior parietal lobule	Left	15071	1504.11	14991.8	1612.55	15372.8	1689.46	13937.9	1752.57	1.57746	0.212528	2.60943	0.109893	0.351075	0.55506
	Right	14373.5	1627.12	14251.4	1631.54	14495.5	1634.06	12899.8	1586.29
Inferior parietal lobule	Left	15839	2058.36	14325.4	1720.48	15420.3	2184.45	13982.6	2518.79	0.202855	0.653559	0.331224	0.566442	2.28672	0.134152
	Right	17077.9	2189.53	14930.6	1772.37	16582.8	2220.16	14737.1	2037.6
Precuneus cortex	Left	11084.5	1416.78	10138.8	1137.01	10761.4	1182.97	9837.43	1218.16	0.826259	0.365897	0.0173722	0.895448	0.748166	0.389464
	Right	11252.1	1188.34	10146.9	1348.61	10993.1	1154.05	9786.39	1164.04
Cuneus cortex	Left	3345.77	658.668	3099.72	580.4	2993.76	592.041	2843.96	568.418	7.1164	0.00912659	0.372357	0.543332	0.387978	0.535013
	Right	3714.09	507.389	3691.39	650.687	3521.79	675.459	3250.13	447.694
Pericalcarine cortex	Left	2099.5	321.377	2296.72	550.502	2187.31	516.455	2002.61	474.031	0.255384	0.614602	3.8488	0.053016	2.54519	0.114299
	Right	2438.05	524.571	2622.11	540.397	2537.62	508.347	2392.52	539.487
Lateral occipital cortex	Left	15373.5	2115.4	13247.6	1503.85	13746	1574.92	12024.8	1416.55	15.647	<0.001*	7.034	0.00952208	0.0609404	0.805604
	Right	14087.1	1688.06	12794.6	1870.28	13072.8	1774.71	11448.5	1541.26
Lingual gyrus	Left	7051	1052.44	6585.67	747.934	6865.72	1228.4	6278.09	1093.34	1.30301	0.256833	1.31863	0.254022	0.485838	0.48767
	Right	6945.77	1057.9	6595.44	963.276	6626.62	1236.5	6072.39	1005.68
Values represent mean of measured volume (mm3). ANCOVA, analysis of covariance.
*Significant after false discovery rate correction
